# Supplementary material
Source: publisher site journal article supplement (https://www.dovepress.com/article/507189)

supplemenatry table 1

| Hotspot genes |         |        |         | Full length genes |        |        | Copy number genes |        |
|---------------|---------|--------|---------|-------------------|--------|--------|-------------------|--------|
| AKT1          | ESR1    | KIT    | PDGFRB  | ARID1A            | FBXW7  | PTEN   | AKT1              | FGFR4  |
| AKT2          | EZH2    | KNSTRN | PIK3CB  | ATM               | MLH1   | RAD50  | AKT2              | FLT3   |
| AKT3          | FGFR1   | KRAS   | PIK3CA  | ATR               | MRE11  | RAD51  | AKT3              | IGF1R  |
| ALK           | FGFR2   | MAGOH  | PPP2R1A | ATRX              | MSH6   | RAD51B | ALK               | KIT    |
| AR            | FGFR3   | MAP2K1 | PTPN11  | BAP1              | MSH2   | RAD51C | AXL               | KRAS   |
| ARAF          | FGFR4   | MAP2K2 | RAC1    | BRCA1             | NBN    | RAD51D | AR                | MDM2   |
| AXL           | FLT3    | MAP2K4 | RAF1    | BRCA2             | NF1    | RNF43  | BRAF              | MDM4   |
| BRAF          | FOXL2   | MAPK1  | RET     | CDK12             | NF2    | RB1    | CCND1             | MET    |
| BTK           | GATA2   | MAX    | RHEB    | CDKN1B            | NOTCH1 | SETD2  | CCND2             | MYC    |
| CBL           | GNA11   | MDM4   | RHOA    | CDKN2A            | NOTCH2 | SLX4   | CCND3             | MYCL   |
| CCND1         | GNAQ    | MED12  | ROS1    | CDKN2B            | NOTCH3 | SMARCA | CCNE1             | MYCN   |
| CDK4          | GNAS    | MET    | SF3B1   | CHEK1             | PALB2  | SMARCB | CDK2              | NTRK1  |
| CDK6          | H3F3A   | MTOR   | SMAD4   | CREBBP            | PIK3R1 | STK11  | CDK4              | NTRK2  |
| CHEK2         | HIST1H3 | MYC    | SMO     | FANCA             | PMS2   | TP53   | CDK6              | NTRK3  |
| CSF1R         | HNF1A   | MYCN   | SPOP    | FANCD2            | POLE   | TSC1   | EGFR              | PDGFRA |
| CTNNB1        | HRAS    | MYD88  | SRC     | FANCI             | PTCH1  | TSC2   | ERBB2             | PDGFRB |
| DDR2          | IDH1    | NFE2L2 | STAT3   |                   |        |        | ESR1              | PIK3CB |
| EGFR          | IDH2    | NRAS   | TERT    |                   |        |        | FGF19             | PIK3CA |
| ERBB2         | JAK1    | NTRK1  | TOP1    |                   |        |        | FGF3              | PPARG  |
| ERBB3         | JAK2    | NTRK2  | U2AF1   |                   |        |        | FGFR1             | RICTOR |
| ERBB4         | JAK3    | NTRK3  | XPO1    |                   |        |        | FGFR2             | TERT   |
| ERCC2         | KDR     | PDGFRA |         |                   |        |        | FGFR3             |        |

| Gene fusion |        |        |
|-------------|--------|--------|
| AKT2        | FGFR2  | NUTM1  |
| ALK         | FGFR3  | PDGFRA |
| AR          | FGR    | PDGFRB |
| AXL         | FLT3   | PIK3CA |
| BRCA1       | JAK2   | PRKACA |
| BRCA2       | KRAS   | PRKACB |
| BRAF        | MDM4   | PTEN   |
| CDKN2A      | MET    | PPARG  |
| EGFR        | MYB    | RAD51B |
| ERBB2       | MYBL1  | RAF1   |
| ERBB4       | NF1    | RB1    |
| ERG         | NOTCH1 | RELA   |
| ESR1        | NOTCH4 | RET    |
| ETV1        | NRG1   | ROS1   |
| ETV4        | NTRK1  | RSPO2  |
| ETV5        | NTRK2  | RSPO3  |
| FGFR1       | NTRK3  | TERT   |

## Supplementary information

Supplementary table 1.

Supplementary figure 1. Pipeline for data analysis of target sequencing. VUS, variants with unknown significance.

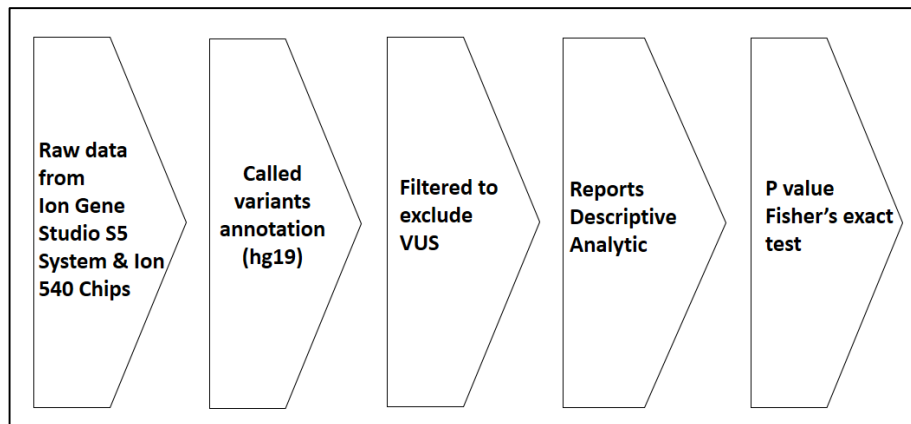

Supplementary table 2. Actionable genes alterations across the level of HER2 expression.

| Subtype                                                          | Actionable gene | Mean              | SD   | Min | Max |
|------------------------------------------------------------------|-----------------|-------------------|------|-----|-----|
| IHC2+/ISH+ (31)*<br>(Mean: 1.97<br>SD: 7.80<br>Min: 0<br>Max: 9) | AKT2            | 0.03              | 0.18 | 0   | 1   |
|                                                                  | BRCA1           | 0.29              | 1.01 | 0   | 4   |
|                                                                  | BRCA2           | 0.29              | 0.64 | 0   | 2   |
|                                                                  | ERBB2           | 0.65              | 0.66 | 0   | 2   |
|                                                                  | ERBB3           | 0.03              | 0.18 | 0   | 1   |
|                                                                  | PIK3CA          | 0.61              | 0.67 | 0   | 2   |
|                                                                  | MDM2            | 0.06              | 0.25 | 0   | 1   |
| IHC3+ (89)*<br>(Mean: 1.92<br>SD: 1.19<br>Min: 0<br>Max: 8)      | AKT2            | 0.01              | 0.11 | 0   | 1   |
|                                                                  | BRCA1           | 0.11              | 0.68 | 0   | 5   |
|                                                                  | BRCA2           | 0.12              | 0.36 | 0   | 2   |
|                                                                  | ERBB2           | 1.21 <sup>#</sup> | 0.46 | 0   | 2   |
|                                                                  | ERBB3           | 0.02              | 0.15 | 0   | 1   |
|                                                                  | PIK3CA          | 0.42              | 0.52 | 0   | 2   |
| MDM2                                                             | 0.02            | 0.15              | 0    | 1   |     |

\*Subtype (Subject number); #, p<0.001 vs IHC2+/ISH+

Supplementary figure 2. CoBar plots of the 20 most commonly mutated alterations between HER2 IHC2+/ISH+ (n=31) and IHC3+ (n=89) groups. Asterisk indicates a *p* value less than 0.05.

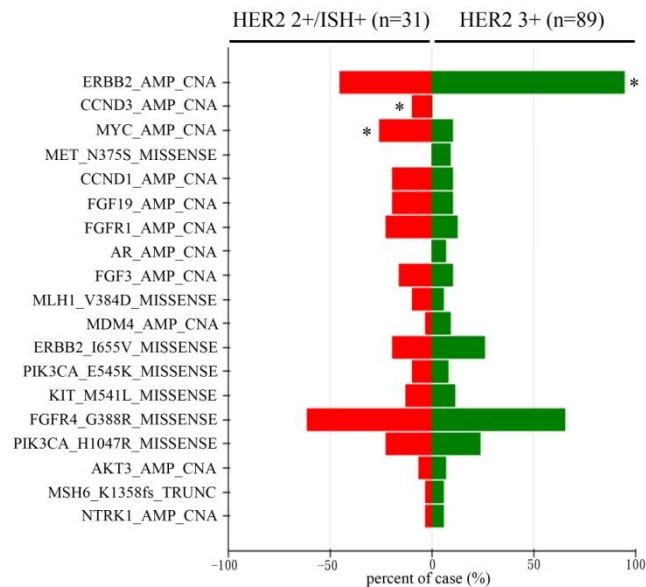

Supplementary figure 3. The prevalence of *ERBB2\_CNA*, *CCND3\_CNA*, *MYC-CNA*, and *FGF3\_CNA* presence in breast cancer samples obtained from TCGA (A) and METABRIC (B) datasets. The prevalence of *ERBB2\_CNA*, *CCND3\_CNA*, *MYC-CNA*, and *FGF3\_CNA* found in TCGA dataset is 14%, 3%, 19%, 15%, respectively. The prevalence of *ERBB2\_CNA*, *CCND3\_CNA*, *MYC-CNA*, and *FGF3\_CNA* found in METABRIC dataset is 18%, 2%, 25%, 16%, respectively.

A. TCGA dataset

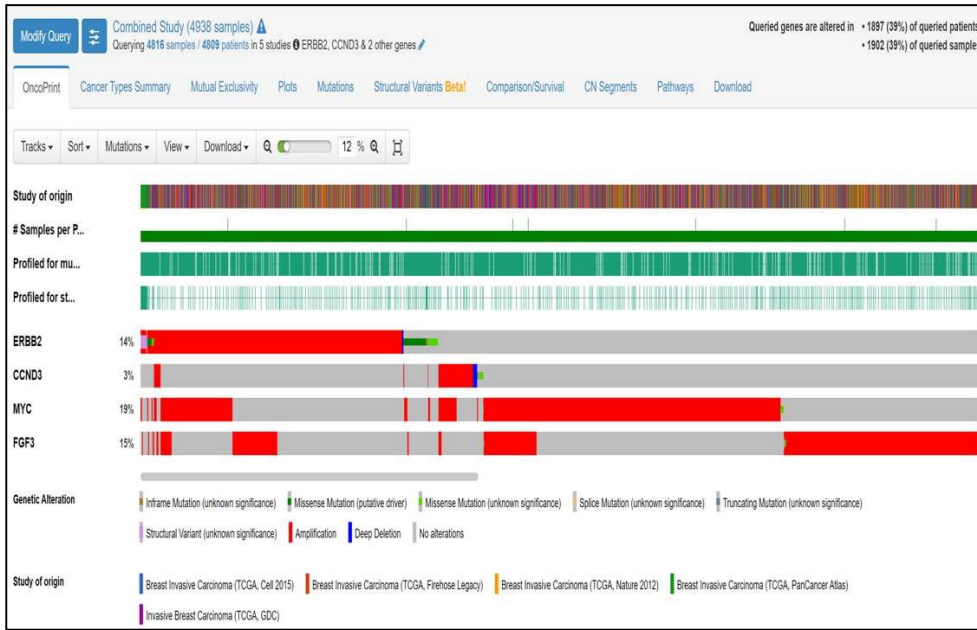

## B. METABRIC dataset

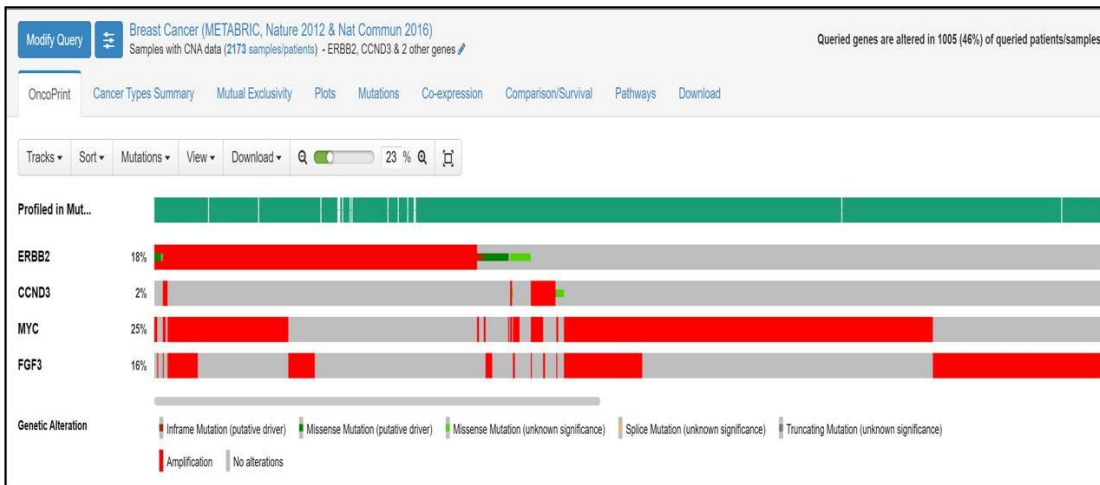

Supplementary table 3. Mutation types across non\_pCR and pCR in HER2 (+) breast cancer

|                                                                 | Mutation Type        | Mean | SD   | Min | Max |
|-----------------------------------------------------------------|----------------------|------|------|-----|-----|
| Non_pCR (21)*<br>(Mean: 8.10<br>SD: 10.60<br>Min: 1<br>Max: 53) | CNA                  | 2.76 | 2.30 | 0   | 8   |
|                                                                 | Expr control         | 0.29 | 1.31 | 0   | 6   |
|                                                                 | Frameshift insertion | 0.05 | 0.22 | 0   | 1   |
|                                                                 | Fusion               | 0.10 | 0.44 | 0   | 2   |
|                                                                 | Gene expression      | 0    | 0    | 0   | 0   |

|             |                        |      |      |   |    |
|-------------|------------------------|------|------|---|----|
|             | Inframe                | 0    | 0    | 0 | 0  |
|             | Missense               | 4.38 | 8.89 | 1 | 43 |
|             | Nonframeshift deletion | 0    | 0    | 0 | 0  |
|             | Truncation             | 0.52 | 1.03 | 0 | 4  |
| pCR (19)*   | CNA                    | 2.05 | 1.99 | 1 | 9  |
| (Mean: 7.58 | Expr control           | 0    | 0    | 0 | 0  |
| SD: 10.10   | Frameshift insertion   | 0.05 | 0.23 | 0 | 1  |
| Min: 2      | Fusion                 | 0.11 | 0.46 | 0 | 2  |
| Max: 48)    | Gene expression        | 0    | 0    | 0 | 0  |
|             | Inframe                | 0    | 0    | 0 | 0  |
|             | Missense               | 4.05 | 9.74 | 0 | 44 |
|             | Nonframeshift deletion | 0.05 | 0.23 | 0 | 1  |
|             | Truncation             | 1.26 | 1.10 | 0 | 3  |

Non\_pCR, non\_pathological complete response; pCR, pathological complete response

\*Subtype (Sample number)

Supplementary table 4. Actionable genes across non\_pCR and pCR in HER2 (+) breast cancer

| Group                                                         | Actionable gene | Mean | SD   |
|---------------------------------------------------------------|-----------------|------|------|
| Non_pCR (21)*<br>(Mean: 2.29<br>SD: 1.49<br>Min: 1<br>Max: 8) | AKT2            | 0.05 | 0.22 |
|                                                               | BRCA1           | 0.24 | 1.09 |
|                                                               | BRCA2           | 0.24 | 0.44 |
|                                                               | ERBB2           | 1    | 0.45 |
|                                                               | ERBB3           | 0    | 0    |
|                                                               | PIK3CA          | 0.67 | 0.48 |
| pCR (19)*<br>(Mean: 2.16<br>SD: 1.86<br>Min: 1<br>Max: 9)     | MDM2            | 0.10 | 0.30 |
|                                                               | AKT2            | 0.05 | 0.23 |
|                                                               | BRCA1           | 0.26 | 0.93 |
|                                                               | BRCA2           | 0.26 | 0.56 |
|                                                               | ERBB2           | 1    | 0.33 |
|                                                               | ERBB3           | 0.16 | 0.37 |
|                                                               | PIK3CA          | 0.42 | 0.51 |
|                                                               | MDM2            | 0    | 0    |

Non\_pCR, non\_pathological complete response; pCR, pathological complete response

\*Subtype (Sample number)

Supplementary table 5. Comparisons of actionable genes across non\_pCR and pCR.

| Chromosome | Type     | ALT    | gene symbol | Non-pCR       |                  |       | pCR           |                  |       | p-value |
|------------|----------|--------|-------------|---------------|------------------|-------|---------------|------------------|-------|---------|
|            |          |        |             | # variant (+) | # total subjects | SF(%) | # variant (+) | # total subjects | SF(%) |         |
| 17         | CNA      | AMP    | ERBB2       | 15            | 21               | 71.4  | 18            | 19               | 94.7  | 0.053   |
| 8          | CNA      | AMP    | FGFR1       | 4             | 21               | 19.0  | 0             | 19               | 0     | 0.045   |
| 3          | MISSENSE | H1047R | PIK3CA      | 8             | 21               | 38.1  | 2             | 19               | 10.5  | 0.044   |

ALT, alteration; AMP, amplification; Chrom, chromosome; CNA, copy number amplification; SF, sample frequency. #, number.

Supplementary figure 4. Oncoplot of comparisons of actionable genes across non\_pCR and pCR.

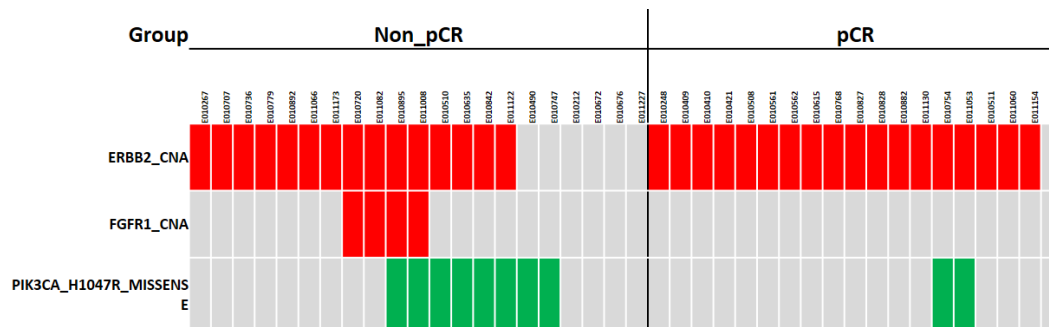

Supplement: Supplementary file 1 [file get_supplementary_file.php]
